# Supplementary material for: AML, NOS and AML-MRC as defined by multilineage dysplasia share a common mutation pattern which is distinct from AML-MRC as defined by MDS-related cytogenetics
Source: PubMed Central journal article supplement (PMC9252909; doi:10.1038/s41375-022-01631-z), 2022-06-20

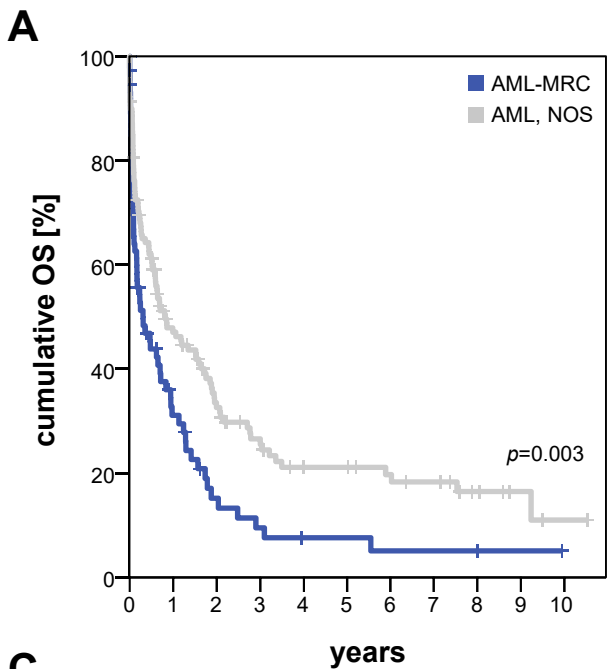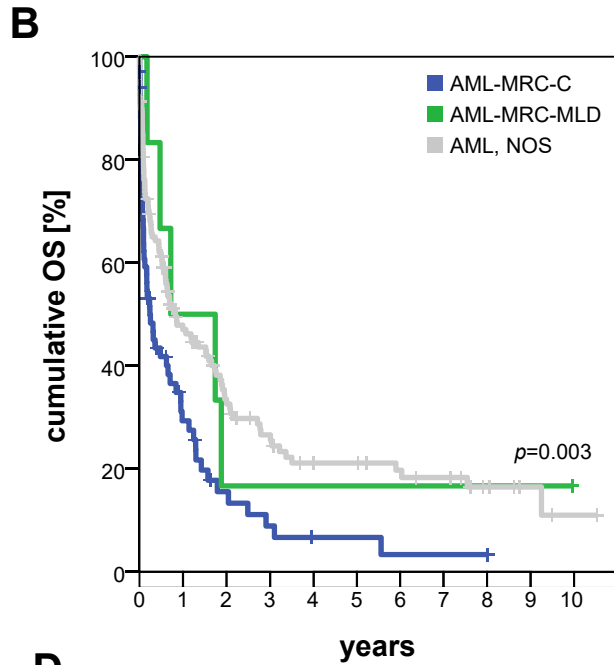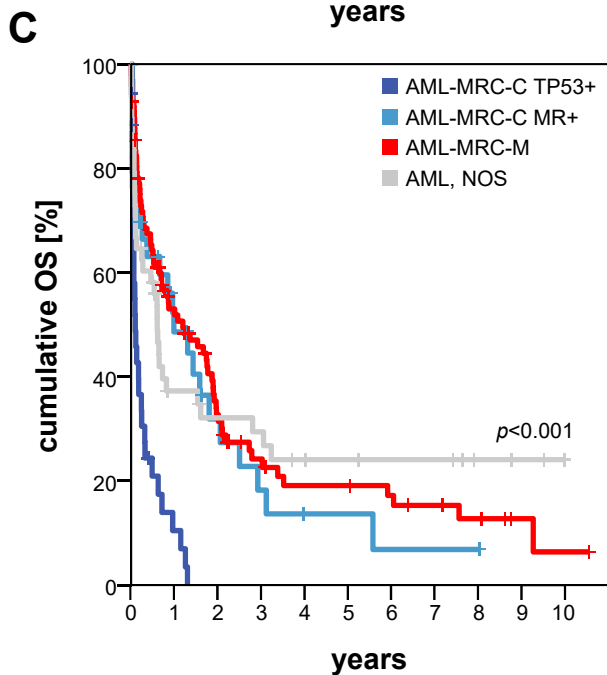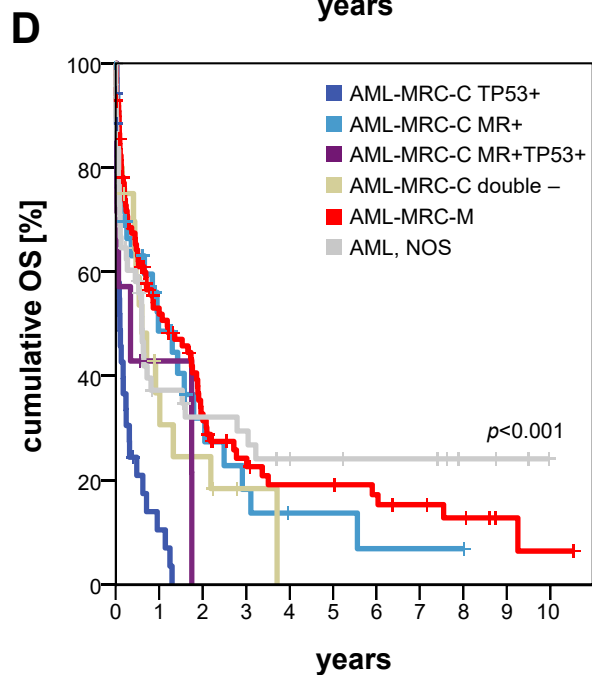

Supplement: 41375_2022_1631_MOESM5_ESM.pdf [file 41375_2022_1631_MOESM5_ESM.pdf]
