# Supplementary material for: AML, NOS and AML-MRC as defined by multilineage dysplasia share a common mutation pattern which is distinct from AML-MRC as defined by MDS-related cytogenetics
Source: PubMed Central journal article supplement (PMC9252909; doi:10.1038/s41375-022-01631-z), 2022-06-20
Supplement: 41375_2022_1631_MOESM6_ESM.pdf [file 41375_2022_1631_MOESM6_ESM.pdf]

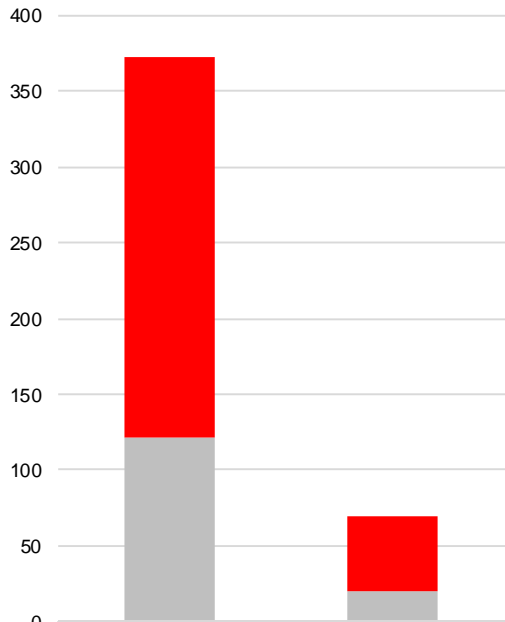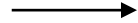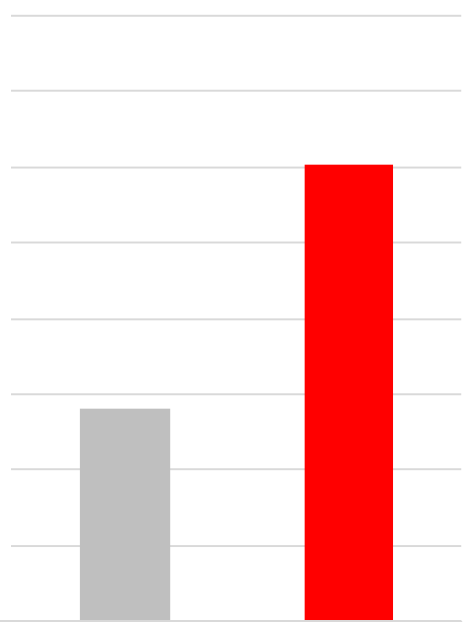

■ MR mutations  
■ no MR mutations

|                 | AML, NOS | AML-MRC-MLD |
|-----------------|----------|-------------|
| MR mutations    | 251      | 50          |
| no MR mutations | 121      | 20          |

|                 | AML, NOS | AML-MRC-M |
|-----------------|----------|-----------|
| MR mutations    | 0        | 301       |
| no MR mutations | 141      | 0         |
